# Supplementary material
Source: publisher figshare collection journal article supplement (https://tandf.figshare.com/articles/dataset/_/5740080)
Supplement: Supplementary file 1 [file 1]

### Supplemental Figure 3

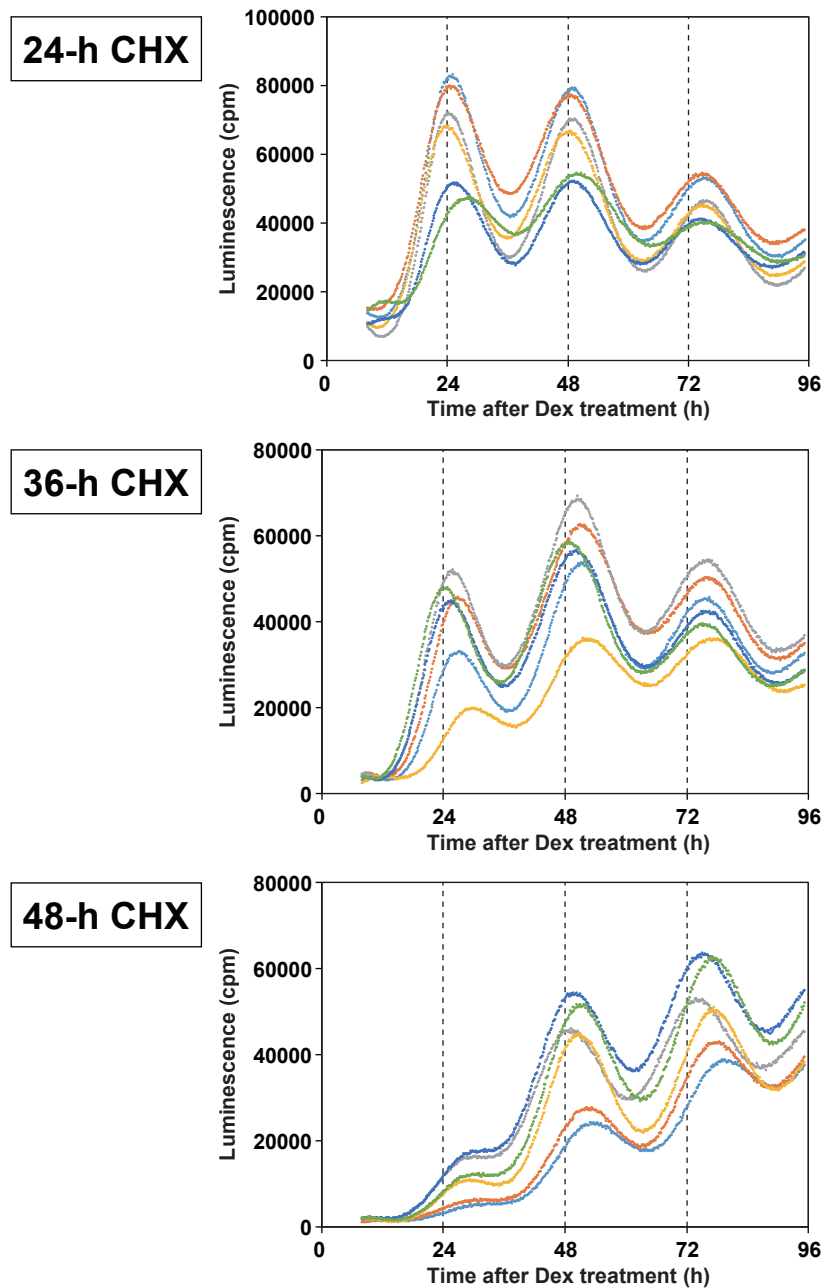

**Supplemental Figure 3.** Bioluminescence recordings of mPER2::LUC MEFs post recovery from CHX treatment. Cells cultured in separate 35-mm dishes were individually subjected to CHX treatment (24, 36, 48 h), recovered in CHX-free medium for 6 h, and re-stimulated with DEX for 3 h. Medium was then replaced with new medium containing 1 mM luciferin and luminescence was recorded in a luminometer-incubator at 37° C (Kronos DIO, ATTO) in successive bins of 20 min (n = 6 dishes, for each CHX condition).
