# Supplementary material
Source: publisher figshare collection journal article supplement (https://tandf.figshare.com/articles/dataset/_/5740080)
Supplement: Supplementary file 3 [file 1]

## Supplemental Figure 1

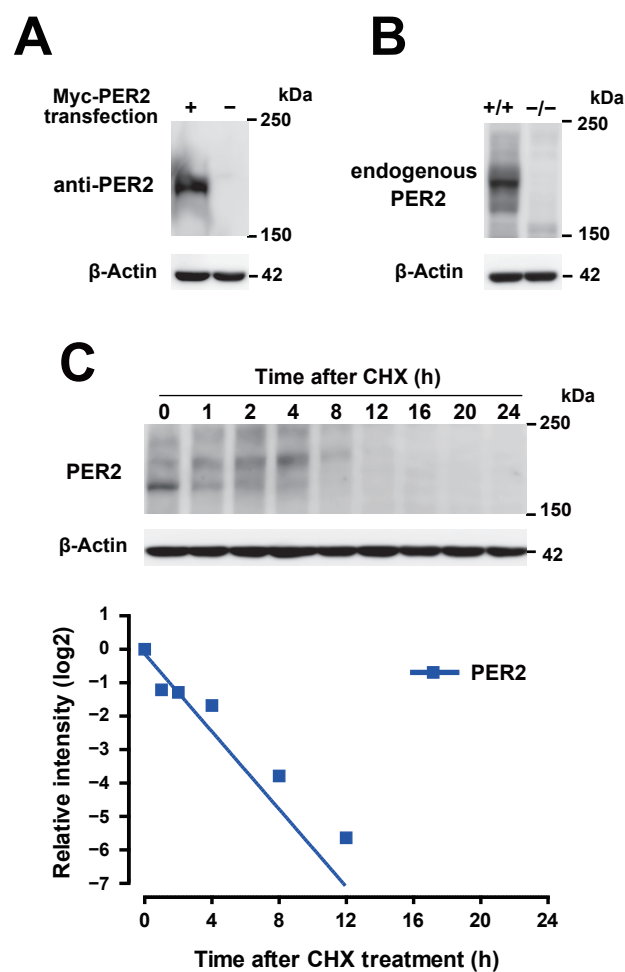

**Supplemental Figure 1.** Specifications of anti-mPER2 antibody used. (A) Immunoblot of transfected Myc-mPER2 in COS7 cells. (B) Immunoblotting with wild-type and *mPer2*-deficient MEF cells. (C) A half-life of the endogenous mPER2 in wild-type MEF. DEX-synchronized cells were treated with CHX at Time0 (see **Figure 1**) and harvested at 0, 1, 2, 4, 8, 12, 16, 20, and 24 h after this treatment. Quantification by densitometry is shown below. The calculated half-life is about 1.72 h.  $\beta$ -Actin immunoblots are shown in each panel as a loading control.
