# Supplementary material
Source: publisher figshare collection journal article supplement (https://tandf.figshare.com/articles/dataset/_/5740080)
Supplement: Supplementary file 4 [file 1]

Archive with 3 entries (3 files):
- Supplemental Figure 1.pdf
- Supplemental Figure 2.pdf
- Supplemental Figure 3.pdf
